# Supplementary material for: Ultrafast and large optical nonlinearity of a TiSe2 saturable absorber in the 2 μm wavelength region
Source: Royal Society of Chemistry journal article supplement (doi:10.1039/c9nr06374a), 2019-01-01
Supplement: c9nr06374a1.pdf [file c9nr06374a1.pdf]

# Ultrafast and Large Optical Nonlinearity of TiSe<sub>2</sub> Saturable Absorber in the 2 μm Wavelength Region

Rongfei Wei,<sup>1\*</sup> Xiangling Tian,<sup>2,3\*</sup> Lupeng Yang,<sup>1</sup> Dandan Yang,<sup>2</sup> Zhijun Ma,<sup>2</sup> Hai Guo,<sup>1</sup> and Jianrong Qiu<sup>2,4\*</sup>

<sup>1</sup>*Department of Physics, Zhejiang Normal University, Jinhua, Zhejiang, 321004, China*

<sup>2</sup>*State Key Laboratory of Luminescent Materials and Devices, School of Materials Science and Engineering, South China*

*University of Technology, Wushan Road 381, Guangzhou 510641, PR China*

<sup>3</sup>*Division of Physics and Applied Physics, School of Physical and Mathematical Sciences, Nanyang Technological University, 21*

*Nanyang Link, Singapore 637371, Singapore*

<sup>4</sup>*State Key Laboratory of Modern Optical Instrumentation, College of Materials Science and Engineering, Zhejiang University,*

*Hangzhou, Zhejiang 310027, PR China.*

*\*rfwei@zjnu.edu.cn; xianglingt@sina.com; qjr@scut.edu.cn*

## Supporting Information

## 1. Experimental Section

### Materials preparation and characterization.

Multilayer TiSe<sub>2</sub> were prepared by liquid phase exfoliation. In briefly, bulk 1T-TiSe<sub>2</sub> power (purchased from Aladdin Reagent Inc.) was treated by ultrasonic vibration in N-Methyl-2-pyrrolidone (NMP) for about 30 min.<sup>1</sup> The dispersion was centrifuged at 5000 rpm, and then TiSe<sub>2</sub> were obtained from the top of the transparent solution. In order to characterize TiSe<sub>2</sub>, the sample was prepared by spin-coating the TiSe<sub>2</sub> solution onto a 0.5 mm thick high-purity fused silica at 500 rpm for 10 min.<sup>2</sup> After that, the sample was dried for 24 h in a vacuum oven. In order to accelerate the volatilization of NMP, appropriate amount of ethanol was added into the solution. The optical absorption spectra were recorded using a spectrophotometer (Elmer Lambda-900 UV/Vis/NIR, Waltham, MA) versus an uncoated quartz substrate as reference. Raman characterization was measured using a confocal microscopy system (Renishaw Via, Gloucestershire, UK) excited by a 532 nm laser. X-ray photoemission spectroscopy (XPS, K-Alpha, Thermo Science, UK) was employed to characterize the binding energies of the Se and Ti. X-ray diffraction (XRD) pattern was carried out by a Bruker diffractometer utilizing Cu K $\alpha$  radiation ( $\lambda=1.5418$  Å). Atomic force microscopy (AFM, Nanoscope IIIa, Veeco) was used to record the thickness of TiSe<sub>2</sub>.

## 2. Calculation of the nonlinear optical parameter.

Briefly, the nonlinear optical (NLO) theory was used to fit the open-aperture (OA) Z-scan datum by according the following formula:<sup>3-6</sup>

$$\frac{dI(z')}{dz'} = -\alpha_0 I(z') - \beta I^2(z') \quad (S1).$$

Here  $I(z')$  is the laser beam irradiance within the sample;  $z'$  is the propagation distance in the sample;  $\alpha_0$  and  $\beta$  present the linear absorption coefficient of the sample and the nonlinear absorptive coefficient, respectively. Hence, open-aperture Z-scan data can be fitted by the following equation:

$$T(z, S = 1) = \sum_{m=0}^{\infty} \frac{[q_0(z)]^m}{(m+1)^{3/2}} \quad (S2).$$

where  $q_0(z) = \beta I_0 L_{\text{eff}} / (1 + z^2/z_R^2)$ ,  $I_0$  presents the on-axis intensity at the beam waist,  $L_{\text{eff}}$  presents the effective length, and  $z_R$  presents the Rayleigh length of the incident femtosecond laser beam. The

effective length can be described by the following relationship:

$$L_{\text{eff}} = \int_0^L \exp(\alpha_0 z') dz' = \frac{1 - e^{-\alpha_0 L}}{\alpha_0} \quad (\text{S3})$$

where,  $L$  is the thickness of the samples.

The imaginary part of the third-order nonlinear susceptibility can be obtained following:

$$\text{Im}\chi^{(3)}(\text{esu}) = \frac{10^{-7} \lambda c^2 n_0^2}{96\pi^2} \beta \quad (\text{S4}).$$

Here,  $c$ ,  $\lambda$ , and  $n$  are, respectively, the speed of light in the vacuum, the wavelength of incident light, and the refractive index.

Then, from the division of the closed-aperture Z-scan by the corresponding OA result, can be well fitted by the following formula:

$$T = 1 + \frac{4x\Delta\Phi}{(1+x^2)(9+x^2)} + \frac{4(3x^2-5)\Delta\Phi^2}{(1+x^2)(9+x^2)(25+x^2)} + \frac{32(3x^2-11)\Delta\Phi^3}{(1+x^2)(9+x^2)(25+x^2)(49+x^2)} \quad (\text{S5}).$$

Here, the on-axis nonlinear phase shift at the focus is  $\Delta\Phi = kI_0(n_2L_{\text{eff}} + n_{2\text{-quartz}}L_{\text{quartz}})$ , here,  $n_2$  describes nonlinear refractive index of materials and  $n_{2\text{-quartz}}$  describes nonlinear refractive index of fused quartz substrate, which is about  $2.0 \times 10^{-7} \text{ cm}^2 \text{ GW}^{-1}$ ;  $L_{\text{quartz}}$  is the thick of fused silica;  $k$  is the wavelength number;  $x=z/z_R$  presents the dimensionless relative position from the waist;  $n_2$  presents nonlinear refractive index. Therefore we obtained the real part of the third-order nonlinear susceptibility from the following relation:

$$\text{Re}\chi^{(3)}(\text{esu}) = \left[ \frac{10^{-7} cn^2}{48\pi^2} \right] n_2 \quad (\text{S6}).$$

The figure of merit (FOM) is calculated as:

$$\text{FOM} = \left| \frac{\text{Im}\chi^{(3)}}{\alpha_0} \right|. \quad (\text{S7})$$

### 3. 2.0 $\mu\text{m}$ fiber laser setup.

The constructed Q-switched Tm-doped fiber (TDF) laser cavity are based on  $\text{TiSe}_2$  saturable absorber.

A commercial 793 nm laser diode (BWT, Beijing) with a multimode fiber pigtail (core diameter: 105

$\mu\text{m}$ ; circular core diameter:  $10\ \mu\text{m}$ ; numerical aperture: 0.22) was used as the pump source to stimulate the gain fiber. A coupler (50:50, IFT, Canada) was employed to output half of the signal laser. In order to maintain the intra-cavity laser propagate unidirectionally, a PI-ISO was constructed in the laser cavity. The  $\text{TiSe}_2$ /poly(vinyl alcohol) (PVA) film was constructed between two FC/PC connectors as the saturable absorber. A PC was employed to control the intra-cavity loss. An InGaAs photodetector (EOT ET-5000F, USA) equipped with an 8 GHz digital oscilloscope was used to monitor the temporal pulse train and single pulse waveforms. The radio frequency (RF) spectrum was recorded by a RF spectrum analyzer (YIAI, China, AV4033A, 30Hz-18GHz). The optical spectrum was investigated using an optical spectrum analyzer (Yokogawa AQ6375, Japan) with a resolution of 0.05 nm. The output power was recorded using a thermal power sensor (S470C, Thorlabs, USA).

#### **4. Results and Discussion.**

Traditional optical pump-probe studies of TMDCs are generally focused on the investigation of resonant or near-resonant 1s-interband excitonic nonlinearities through adjusting the probe wavelength close to the exciton line.<sup>7-9</sup> Due to the band gap of TMDCs, both visible and near-infrared (NIR) pulses are usually employed as optical pump,<sup>10-13</sup> as schematically illustrated in Figure S1. In order to match the different response of photo-induced carriers, probe photon energies from the NIR to mid-infrared (MIR) region are typically utilized to investigate various kinds of bound and unbound carriers.<sup>14-18</sup> In contrast to NIR spectrum, MIR spectrum probe is sensitive to free carriers and weakly bound carriers due to the low probe energy.<sup>7, 9, 15</sup> In particular, if close to the excitonic resonances or intra-excitonic resonances, MIR spectrum probe is also utilized to investigate the strongly bound carriers. Further consideration of  $\text{TiSe}_2$  with a very small gap ( $<150\ \text{meV}$ ), it is difficult to implement excitonic resonance probe measurements by a long-wavelength probe ( $>10\ \mu\text{m}$ ) due to technical restriction. Comparing all results obtained from pump-probe methods under the pump of visible or NIR, photo-induced carrier dynamics in TMDCs or  $\text{Cd}_3\text{As}_2$  are clearly described,<sup>19, 20</sup> revealing thermal scatter effect (*e.g.*, electron-electron coupling and electron-phonon coupling) in detail. Therefore, NIR is utilized to be as pump-probe source to measure the changes in the  $\text{TiSe}_2$ , as depicted in Figure S1.

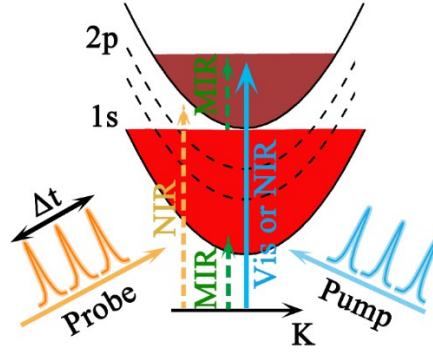

**Fig.S1.** Schematic diagram of multiple ultrafast pump-probe process. The relaxation pathways for the photo-induced carriers with optional excitation of visible (Vis), near-infrared (NIR) and mid-infrared (MIR). Solid line presents pump pulses and dashed line denotes possible transition by probe pulses.

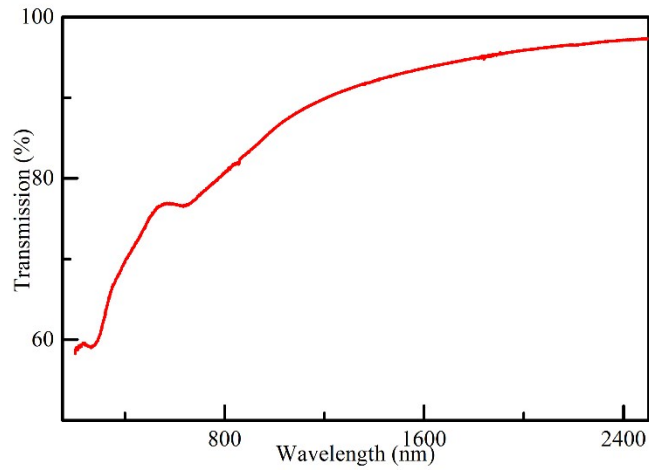

**Fig. S2.** The linear transmittance of  $\text{TiSe}_2$ .

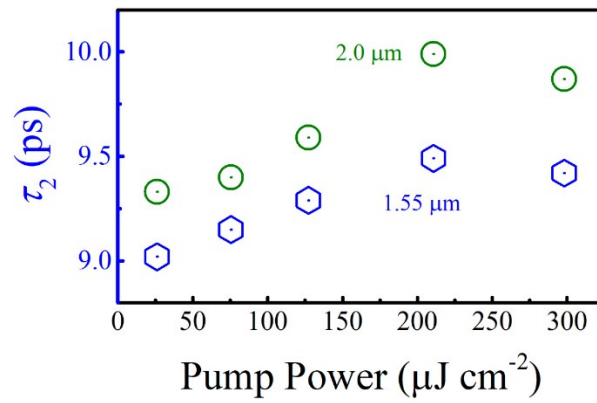

**Fig. S3.** The slow time component as a function of pump fluence.

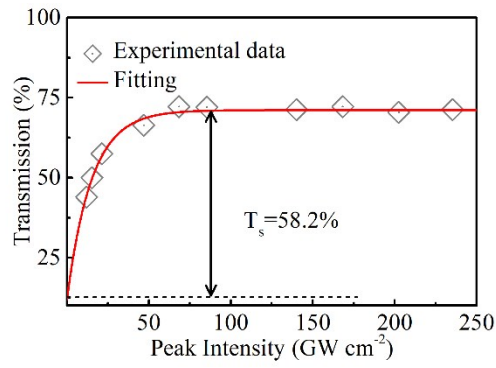

**Fig. S4.** Transmittance as a function of pulse peak intensity. The red line is fitting curve by  $T(I)=1-\Delta T \times \exp(-I/I_{\text{sat}})-T_{\text{ns}}$ ,

in which  $I$ ,  $T$ ,  $I_{\text{sat}}$ , and  $T_{\text{ns}}$  are the input intensity, modulation depth, saturable intensity and nonsaturable absorbance, respectively.

**Table S1** NLO parameters of several typical materials

| Laser                 | Sample                           | $\beta$ (cm GW <sup>-1</sup> )    | $n_2$ (cm <sup>2</sup> GW <sup>-1</sup> ) |
|-----------------------|----------------------------------|-----------------------------------|-------------------------------------------|
| 1030 nm, 1kHz, 340 fs | MoS <sub>2</sub> <sup>21</sup>   | $-(9.17 \pm 2.56) \times 10^{-2}$ | N/A                                       |
|                       | MoSe <sub>2</sub> <sup>21</sup>  | $-(1.29 \pm 0.13) \times 10^{-2}$ | N/A                                       |
|                       | MoTe <sub>2</sub> <sup>21</sup>  | $-(7.50 \pm 0.47) \times 10^{-3}$ | N/A                                       |
|                       | Graphene <sup>21</sup>           | $-(9.40 \pm 3.18) \times 10^{-2}$ | N/A                                       |
| 1550 nm, 35fs         | Black Phosphorus <sup>22</sup>   | $-0.15 \times 10^{-3}$            | N/A                                       |
| 1240 nm, 150 fs, 1kHz | ITO film <sup>23</sup>           | -7000~8000                        | 0.11                                      |
| 1420 nm,              | ITO film/Gold <sup>24</sup>      | $2 \times 10^4$                   | 3.73                                      |
| 1500 nm, 35 fs, 1kHz  | ITO NCs <sup>25</sup>            | -51.4                             | N/A                                       |
| 1300 nm               | AZO films <sup>26</sup>          | N/A                               | 0.17                                      |
| 1550 nm, 150 fs       | SWNTs <sup>27</sup>              | N/A                               | $10^{-10}$                                |
| 800 nm, 220 fs        | Au nanorodes <sup>28</sup>       | -1.5                              | $-1.2 \times 10^{-12}$                    |
| 1550 nm 120 fs        | TiSe <sub>2</sub> <sup>[a]</sup> | -0.17                             | 0.088                                     |
| 2000 nm 120 fs        | TiSe <sub>2</sub> <sup>[a]</sup> | -0.10                             | 0.091                                     |

<sup>a</sup>This work

1. B. Yan, B. Zhang, H. Nie, G. Li, X. Sun, Y. Wang, J. Liu, B. Shi, S. Liu and J. He, *Nanoscale*, 2018, **10**, 20171-20177.
2. W. Wang, W. Yue, Z. Liu, T. Shi, J. Du, Y. Leng, R. Wei, Y. Ye, C. Liu, X. Liu and J. Qiu, *Adv. Opt. Mater.*, 2018, **6**, 1700948.
3. R. Wei, H. Zhang, X. Tian, T. Qiao, Z. Hu, Z. Chen, X. He, Y. Yu and J. Qiu, *Nanoscale*, 2016, **8**, 7704-7710.
4. X. Tian, R. Wei, M. Liu, C. Zhu, Z. Luo, F. Wang and J. Qiu, *Nanoscale*, 2018, **10**, 9608-9615.
5. R. Wei, H. Zhang, X. He, Z. Hu, X. Tian, Q. Xiao, Z. Chen and J. Qiu, *Opt. Mater. Express*,

- 2015, **5**, 1807-1814.
6. R. Wei, H. Zhang, Z. Hu, T. Qiao, X. He, Q. Guo, X. Tian, Z. Chen and J. Qiu, *Nanotechnology*, 2016, **27**.
  7. Z. Chi, H. Chen, Z. Chen, Q. Zhao, H. Chen and Y.-X. Weng, *ACS Nano*, 2018, **12**, 8961-8969.
  8. B. T. Diroll, P. Guo, R. P. H. Chang and R. D. Schaller, *ACS Nano*, 2016, **10**, 10099-10105.
  9. S. Cha, J. H. Sung, S. Sim, J. Park, H. Heo, M.-H. Jo and H. Choi, *Nat. Commun.*, 2016, **7**, 10768.
  10. L. Yang, N. A. Sinitsyn, W. Chen, J. Yuan, J. Zhang, J. Lou and Scott A. Crooker, *Nat. Phys.*, 2015, **11**, 830-834.
  11. A. Singh, G. Moody, S. Wu, Y. Wu, N. J. Ghimire, J. Yan, D. G. Mandrus, X. Xu and X. Li, *Phys. Rev. Lett.*, 2014, **112**, 216804.
  12. M. Z. Bellus, M. Mahjouri-Samani, S. D. Lane, A. D. Oyedele, X. Li, A. A. Puzos, D. Geohegan, K. Xiao and H. Zhao, *ACS Nano*, 2018, **12**, 7086-7092.
  13. X. Hong, J. Kim, S.-F. Shi, Y. Zhang, C. Jin, Y. Sun, S. Tongay, J. Wu, Y. Zhang and F. Wang, *Nat. Nanotechnol.*, 2014, **9**, 682-686.
  14. H. Wang, C. Zhang and F. Rana, *Nano Lett.*, 2015, **15**, 339-345.
  15. H. Chen, X. Wen, J. Zhang, T. Wu, Y. Gong, X. Zhang, J. Yuan, C. Yi, J. Lou, P. M. Ajayan, W. Zhuang, G. Zhang and J. Zheng, *Nat. Commun.*, 2016, **7**, 12512.
  16. H. Wang, C. Zhang and F. Rana, *Nano Lett.*, 2015, **15**, 8204-8210.
  17. C. Poellmann, P. Steinleitner, U. Leierseder, P. Nagler, G. Plechinger, M. Porer, R. Bratschitsch, C. Schüller, T. Korn and R. Huber, *Nat. Mater.*, 2015, **14**, 889-893.
  18. M. Wagner, Z. Fei, A. S. McLeod, A. S. Rodin, W. Bao, E. G. Iwinski, Z. Zhao, M. Goldflam, M. Liu, G. Dominguez, M. Thiemens, M. M. Fogler, A. H. Castro Neto, C. N. Lau, S. Amarie, F. Keilmann and D. N. Basov, *Nano Lett.*, 2014, **14**, 894-900.
  19. X. Tian, H. Luo, R. Wei, C. Zhu, Q. Guo, D. Yang, F. Wang, J. Li and J. Qiu, *Adv. Mater.*, 2018, **30**, 1801021.
  20. C. Zhu, F. Wang, Y. Meng, X. Yuan, F. Xiu, H. Luo, Y. Wang, J. Li, X. Lv, L. He, Y. Xu, J. Liu, C. Zhang, Y. Shi, R. Zhang and S. Zhu, *Nat. Commun.*, 2017, **8**, 14111.
  21. F. Wang, T. A. Shifa, X. Zhan, Y. Huang, K. Liu, Z. Cheng, C. Jiang and J. He, *Nanoscale*, 2015, **7**, 19764-19788.
  22. Y. Wang, G. Huang, H. Mu, S. Lin, J. Chen, S. Xiao, Q. Bao and J. He, *Appl. Phys. Lett.*, 2015, **107**, 091905.
  23. M. Z. Alam, I. De Leon and R. W. Boyd, *Science*, 2016, **352**, 795.
  24. M. Z. Alam, S. A. Schulz, J. Upham, I. De Leon and R. W. Boyd, *Nat. Photonics*, 2018, **12**, 79-83.
  25. Q. Guo, Y. Cui, Y. Yao, Y. Ye, Y. Yang, X. Liu, S. Zhang, X. Liu, J. Qiu and H. Hosono, *Adv. Mater.*, 2017, **29**, 1700754.
  26. N. Kinsey, C. DeVault, J. Kim, M. Ferrera, V. M. Shalaev and A. Boltasseva, *Optica*, 2015, **2**, 616-622.
  27. Y. C. Chen, N. R. Raravikar, L. S. Schadler, P. M. Ajayan, Y. P. Zhao, T. M. Lu, G. C. Wang and X. C. Zhang, *Appl. Phys. Lett.*, 2002, **81**, 975-977.
  28. H. I. Elim, J. Yang, J.-Y. Lee, J. Mi and W. Ji, *Appl. Phys. Lett.*, 2006, **88**, 083107.
